# Supplementary material for: Polymer supported Pd catalyzed carbonylation of aryl bromides for the synthesis of aryl esters and amides
Source: Royal Society of Chemistry journal article supplement (doi:10.1039/c4ra05365f), 2014-01-01
Supplement: c4ra05365f1.pdf [file c4ra05365f1.pdf]

## Supporting information

### **Polymer Supported Pd Catalyzed Carbonylation of Aryl Bromides for the Synthesis of Aryl esters and amides**

S. M. Islam,\* Kajari Ghosh, Anupam Singha Roy<sup>‡</sup>, Rostam Ali Molla<sup>‡</sup>

*Department of Chemistry, University of Kalyani, Kalyani, Nadia, 741235, W.B., India.*

<sup>‡</sup>These authors contributed equally to this manuscript.

---

|            |                                                                                                                               |                |
|------------|-------------------------------------------------------------------------------------------------------------------------------|----------------|
| <b>I</b>   | <b><sup>1</sup>H NMR Spectral data of alkoxy carbonylation products .....</b>                                                 | <b>S2-S3</b>   |
| <b>II</b>  | <b><sup>1</sup>H NMR Spectral data of amino carbonylation products .....</b>                                                  | <b>S3-S4</b>   |
| <b>III</b> | <b><sup>1</sup>H NMR Spectra of alkoxy carbonylation products .....</b>                                                       | <b>S5-S13</b>  |
| <b>IV</b>  | <b><sup>1</sup>H NMR Spectra of amino carbonylation products .....</b>                                                        | <b>S14-S22</b> |
| <b>V</b>   | <b>Fig. S1. FTIR spectra of chloromethylated polystyrene (a)<br/>and aldehyde functionalized polystyrene, PS-CHO (b).....</b> | <b>S22</b>     |

## **I. <sup>1</sup>H NMR Data of alkoxy carbonylation products**

### **Ethyl Benzoate (Table 4, entry 1)**

<sup>1</sup>H NMR (400 MHz, CDCl<sub>3</sub>): δ 8.03-8.06 (m, 2H), 7.52-7.57 (m, 1H), 7.41-7.46 (m, 2H), 4.38 (q, 2H, *J* = 7.1 Hz), 1.41 (t, 3H, *J* = 7.2 Hz),

### **Ethyl 2-methylbenzoate (Table 4, entry 2)**

<sup>1</sup>H NMR (400 MHz, CDCl<sub>3</sub>): δ 7.91 (d, 1H, *J* = 8.0 Hz), 7.36 (t, 1H, *J* = 7.6 Hz), 7.21 (t, 2H, *J* = 7.6 Hz), 4.36 (q, 2H, *J* = 7.3 Hz), 2.58 (s, 3H), 1.38 (t, 3H, *J* = 7.1 Hz)

### **Ethyl 4-methylbenzoate (Table 4, entry 3)**

<sup>1</sup>H NMR (300 MHz, CDCl<sub>3</sub>): δ 7.80 (d, 2H, *J* = 7.8 Hz), 7.09 (d, 2H, *J* = 7.8 Hz), 4.24 (q, 2H, *J* = 7.2 Hz), 2.26 (s, 3H), 1.26 (t, 3H, *J* = 7.2 Hz)

### **Ethyl 3-methylbenzoate (Table 4, entry 4)**

<sup>1</sup>H NMR (400 MHz, CDCl<sub>3</sub>): δ 7.84-7.88 (m, 2H), 7.28-7.36 (m, 2H), 4.38 (q, 2H, *J* = 7.3 Hz), 2.41 (s, 3H), 1.38 (t, 3H, *J* = 7.1 Hz)

### **Ethyl 2-methoxybenzoate (Table 4, entry 5)**

<sup>1</sup>H NMR (400 MHz, CDCl<sub>3</sub>): δ 7.78-7.80 (m, 1H), 7.44-7.49 (m, 1H), 6.96-6.98 (m, 2H), 4.37 (q, 2H, *J* = 7.2 Hz), 3.90 (s, 3H), 1.39 (t, 3H, *J* = 7.1 Hz)

### **Ethyl 4-methoxybenzoate (Table 4, entry 6)**

<sup>1</sup>H NMR (300 MHz, CDCl<sub>3</sub>): δ 8.01 (d, 2H, *J* = 8.8 Hz), 6.92 (d, 2H, *J* = 8.8 Hz), 4.36 (q, 2H, *J* = 7.3 Hz), 3.85 (s, 3H), 1.39 (t, 3H, *J* = 7.2 Hz)

### **Ethyl 3-methoxybenzoate (Table 4, entry 7)**

<sup>1</sup>H NMR (300 MHz, CDCl<sub>3</sub>): δ 7.66 (d, 1H, *J* = 7.8 Hz), 7.76 (s, 1H), 7.35 (dd, 1H, *J* = 8.2, 7.9 Hz), 7.11 (dd, 1H, *J* = 8.1, 1.8 Hz), 4.39 (q, 2H, *J* = 6.9 Hz), 3.86 (s, 3H), 1.41 (t, 3H, *J* = 6.9 Hz)

### **Ethyl 2-nitrobenzoate (Table 4, entry 8)**

<sup>1</sup>H NMR (300 MHz, CDCl<sub>3</sub>): δ 7.93 (d, 1H, *J* = 7.6 Hz), 7.77 (d, 1H, *J* = 7.2 Hz), 7.72-7.62 (m, 2H), 4.40 (q, 2H, *J* = 7.2 Hz), 1.36 (t, 3H, *J* = 7.2 Hz)

### **Ethyl 4-nitrobenzoate (Table 4, entry 9)**

<sup>1</sup>H NMR (400 MHz, CDCl<sub>3</sub>): δ 8.28-8.31 (m, 2H), 8.21-8.24 (m, 2H), 4.45 (q, 2H, *J* = 7.2 Hz), 1.45 (t, 3H, *J* = 7.0 Hz)

### **Ethyl 4-fluorobenzoate (Table 4, entry 10)**

<sup>1</sup>H NMR (400 MHz, CDCl<sub>3</sub>): δ 8.04-8.09 (m, 2H), 7.08-7.14 (m, 2H), 4.38 (q, 2H, *J* = 7.0 Hz), 1.40 (t, 3H, *J* = 7.0 Hz)

### **Ethyl 4- (trifluoromethyl) benzoate (Table 4, entry 11)**

<sup>1</sup>H NMR (400 MHz, CDCl<sub>3</sub>): δ 8.16 (dd, 2H, *J*<sub>1</sub> = 0.5 Hz, *J*<sub>2</sub> = 8.9 Hz), 7.70 (d, 2H, *J* = 8.4 Hz), 4.42 (q, 2H, *J* = 7.1 Hz), 1.43 (t, 3H, *J* = 7.2 Hz)

### **Ethyl 4-cyanobenzoate (Table 4, entry 12)**

<sup>1</sup>H NMR (300 MHz, CDCl<sub>3</sub>): δ 8.16 (d, 2H, *J* = 6.9 Hz), 7.76 (d, 2H, *J* = 6.8 Hz), 4.43 (q, 2H, *J* = 7.2 Hz), 1.42 (t, 3H, *J* = 7.2 Hz)

**Ethyl 4-Acetylbenzoate (Table 4, entry 13)**

<sup>1</sup>H NMR (300 MHz, CDCl<sub>3</sub>): δ 8.15-8.12 (m, 2H), 8.03- 8.00 (m, 2H), 4.42 (q, 2H, *J* = 6.9 Hz), 2.65 (s, 3H), 1.42 (t, 3H, *J* = 6.9 Hz)

**Diethyl terephthalate (Table 4, entry 14)**

<sup>1</sup>H NMR (300 MHz, CDCl<sub>3</sub>): δ 8.11 (s, 4H), 4.40 (q, 2H, *J* = 7.2 Hz), 1.41 (t, 3H, *J* = 7.2 Hz)

**Ethyl isonicotinate (Table 4, entry 15)**

<sup>1</sup>H NMR (400 MHz, CDCl<sub>3</sub>): δ 9.23 (d, 1H, *J* = 2.0 Hz), 8.78 (m, 1H), 8.31 (m, 1H), 7.40 (m, 1H), 4.42 (q, 2H, *J* = 7.1 Hz), 1.43 (t, 3H, *J* = 7.0 Hz)

**Ethyl thiophene-2-carboxylate (Table 4, entry 16)**

<sup>1</sup>H NMR (300 MHz, CDCl<sub>3</sub>): δ 7.80 (d, 1H, *J* = 3.0 Hz), 7.55 (d, 1H, *J* = 4.5 Hz), 7.10 (dd, 1H, *J* = 3.0, 4.5 Hz), 4.36 (q, 2H, *J* = 7.2 Hz), 1.38 (t, 3H, *J* = 7.2 Hz)

**Ethyl 1-naphthoate (Table 4, entry 17)**

<sup>1</sup>H NMR (300 MHz, CDCl<sub>3</sub>): δ 8.93 (d, 1H, *J* = 8.4 Hz), 8.17 (d, 1H, *J* = 7.2 Hz), 7.98 (d, 1H, *J* = 8.2 Hz), 7.86 (d, 1H, *J* = 8.1 Hz), 7.60 (t, 1H, *J* = 7.2 Hz), 7.52-7.43 (m, 2H), 4.45 (q, 2H, *J* = 7.2 Hz), 1.44 (t, 3H, *J* = 7.2 Hz)

**Ethyl biphenyl-4-carboxylate (Table 4, entry 18)**

<sup>1</sup>H NMR (300 MHz, CDCl<sub>3</sub>): δ 8.12 (d, 2H, *J* = 8.7 Hz), 7.64 (t, 4H, *J* = 8.8 Hz), 7.47 (t, 2H, *J* = 7.2 Hz), 7.40 (m, 1H), 4.41 (q, 2H, *J* = 7.2 Hz), 1.42 (t, 3H, *J* = 7.2 Hz)

**II. <sup>1</sup>H NMR Data of amino carbonylation products****N-Phenylbenzamide (Table 7, entry 1)**

<sup>1</sup>H NMR (300 MHz, CDCl<sub>3</sub>): δ 7.98 (br, s, 1H), 7.87-8.83 (m, 2H), 7.63 (d, 2H, *J* = 7.6 Hz), 7.32-7.53 (m, 5H), 7.16 (t, 1H, *J* = 7.3)

**N-(4-methoxyphenyl)benzamide (Table 7, entry 2)**

<sup>1</sup>H NMR (300 MHz; *d*<sub>6</sub>-DMSO): δ 10.12 (s, 1H), 7.94 (d, 2H, *J* = 6.8 Hz), 7.67 (d, 2H, *J* = 9.0 Hz), 7.46-7.62 (m, 3H), 6.92 (d, 2H, *J* = 9.0 Hz), 3.76 (s, 3H)

**N-Benzylbenzamide (Table 7, entry 3)**

<sup>1</sup>H NMR (300 MHz, CDCl<sub>3</sub>): δ 7.98-7.75 (d, 2H, *J* = 7.3 Hz), 7.40-7.29 (m, 8H), 6.70 (br, s, 1H), 4.60 (d, 2H, *J* = 5.7 Hz)

**N-Cyclohexylbenzamide (Table 7, entry 4)**

<sup>1</sup>H NMR (300 MHz, CDCl<sub>3</sub>): δ 7.78-7.75 (m, 2H), 7.36-7.46 (m, 3H), 6.18 (br, s, 1H), 3.98-3.95 (m, 1H), 2.03-1.98 (m, 2H), 1.77-1.61 (m, 3H), 1.43-1.15 (m, 5H)

**N-[3-(Trifluoromethyl)phenyl]benzamide (Table 7, entry 5)**

<sup>1</sup>H NMR (400 MHz, CDCl<sub>3</sub>): δ 8.09 (s, 1H), 7.97 (s, 1H), 7.90 (m, 3H), 7.60 (t, 1H, *J* = 7.40), 7.51 (m, 3H), 7.43 (d, 1H, *J* = 7.79 Hz)

**N-Benzyl-4-methylbenzamide (Table 7, entry 6)**

<sup>1</sup>H NMR (300 MHz, CDCl<sub>3</sub>): δ 7.79-7.66 (m, 2H), 7.36-7.12 (m, 7H), 6.93 (bs, 1H), 4.54 (d,

2H,  $J = 4.8$  Hz), 2.34 (s, 3H)

***N*-Benzyl-4-methoxybenzamide (Table 7, entry 7)**

$^1\text{H}$  NMR (300 MHz,  $\text{CDCl}_3$ ):  $\delta$  7.78 (d, 2H,  $J = 8.1$  Hz), 7.34 (bs, 5H), 6.92 (d, 2H,  $J = 8.4$  Hz), 6.36 (bs, 1H), 4.64 (d, 2H,  $J = 5.4$  Hz), 3.84 (s, 3H)

**4-methoxy-*N*-phenylbenzamide (Table 7, entry 8)**

$^1\text{H}$  NMR (400 MHz,  $\text{CDCl}_3$ )  $\delta$ : 7.83-7.85 (m, 2H), 7.62-7.64 (m, 2H), 7.34- 7.38 (m, 2H), 7.76 (bs, 1H), 7.12-7.16 (m, 1H), 6.96-6.98 (m, 2H), 3.88 (s, 3H).

***N*-Benzyl-3-chlorobenzamide (Table 7, entry 9)**

$^1\text{H}$  NMR (300 MHz,  $\text{CDCl}_3$ ):  $\delta$  7.79-7.76 (m, 1H), 7.67 -7.64 (m, 1H), 7.47- 7.34 (m, 7H), 6.44 (bs, 1H), 4.63 (d, 2H,  $J = 5.4$  Hz)

***N*-Benzyl-naphthalene-1-carboxamide (Table 7, entry 10)**

$^1\text{H}$  NMR (400 MHz,  $\text{CDCl}_3$ )  $\delta$  8.33-8.35 (m, 1H) 7.85-7.91 (m, 2H), 7.49-7.60 (m, 3H), 7.28-7.43 (m, 6H), 6.40 (br s, 1H), 4.70 (d, 2H,  $J = 5.6$  Hz).

***N*-benzylnicotinamide (Table 7, Entry 11)**

$^1\text{H}$  NMR (400 MHz, DMSO)  $\delta$  9.26 (s, 1H), 9.05 (s, 1H), 8.71 (s, 1H), 8.22 (s, 1H), 7.52 (s, 1H), 7.33 (s, 4H), 7.25 (s, 1H), 4.50 (s, 2H)

***N*-Benzylthiophene-3-carboxamide (Table 7, entry 12)**

$^1\text{H}$  NMR (400 MHz,  $\text{CDCl}_3$ )  $\delta$  7.87-7.8 (m, 1H), 7.39-7.41 (m, 1H), 7.26-7.35 (m, 6H), 6.62 (br s, 1H), 4.58 (d, 2H,  $J = 5.5$  Hz).

***N*-Methyl-*N*-phenyl-benzamide (Table 7, entry 13)**

$^1\text{H}$  NMR (400MHz,  $\text{CDCl}_3$ ):  $\delta$  7.27-7.32 (m, 2H), 7.21-7.26 (m, 6H), 7.04-7.19 (m, 2H), 3.52 (s, 3H)

***N*-benzylmorpholine (Table 7, entry 14)**

$^1\text{H}$  NMR (400MHz,  $\text{CDCl}_3$ ):  $\delta$  7.96 (d,  $J = 8.0$ Hz, 2H), 7.66 (t,  $J = 7.6$  Hz, 1H), 7.52 (t,  $J = 7.6$  Hz, 2H), 3.84-3.75 (m, 4H), 3.65 (t,  $J = 4.8$  Hz, 2H), 3.38 (t,  $J = 4.8$  Hz, 2H);

***N*-(4-toluoyl)morpholine (Table 7, entry 15)**

$^1\text{H}$  NMR (400MHz,  $\text{CDCl}_3$ ):  $\delta$  7.85 (d,  $J = 8.0$  Hz, 2H), 7.32 (d,  $J = 8.0$  Hz, 2H), 3.76 (s, 4H), 3.62 (t,  $J = 4.4$  Hz, 2H), 3.35 (t,  $J = 4.4$  Hz, 2H), 2.42 (s, 3H);

***N*-(4-methoxybenzoyl)morpholine (Table 7, entry 16)**

$^1\text{H}$  NMR (400MHz,  $\text{CDCl}_3$ ):  $\delta$  7.92 (dt,  $J = 8.8$  Hz,  $J = 2.4$  Hz, 2H), 6.99 (dt,  $J = 8.8$  Hz,  $J = 2.4$  Hz, 2H), 3.88 (s, 3H), 3.81-3.76 (m, 4H), 3.65 (t,  $J = 4.8$  Hz, 2H), 3.38(d,  $J = 4.8$ Hz, 2H)

***N*-(4-methoxybenzoyl)morpholine (Table 7, entry 17)**

$^1\text{H}$  NMR (400MHz,  $\text{CDCl}_3$ ):  $\delta$  7.68 (d,  $J = 8.0$ Hz, 2H), 7.53 (d,  $J = 8.0$ Hz, 2H), 3.89-3.71 (m, 4H), 3.70-3.56 (m, 2H), 3.50-3.30 (m, 2H)

### III. $^1\text{H}$ NMR Spectra of alkoxy carbonylation products

Table 4, entry 1

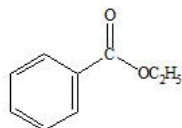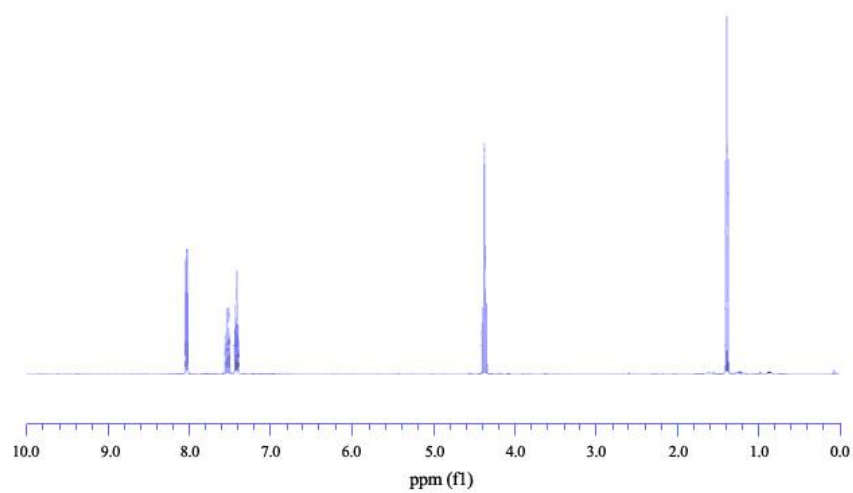

Table 4, entry 2

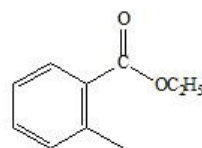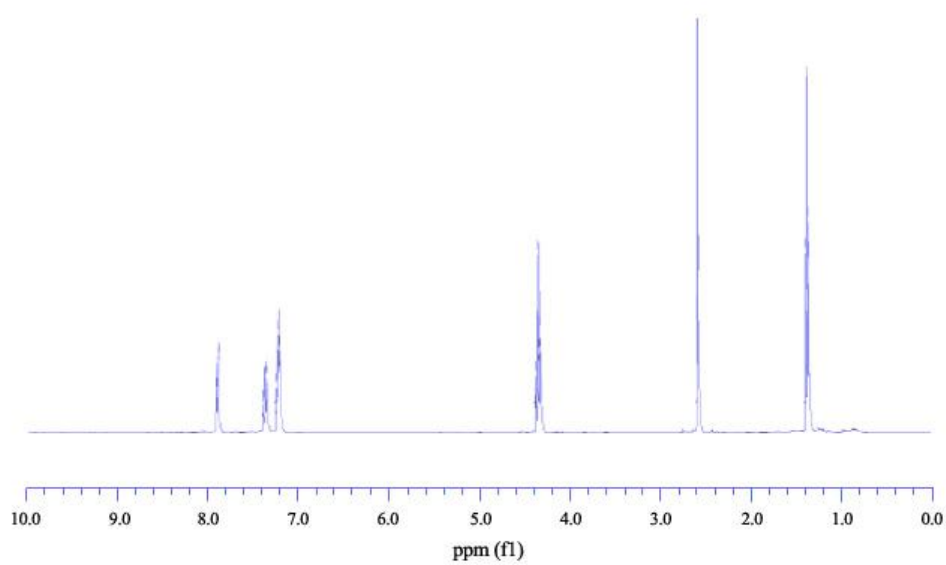

Table 4, entry 3

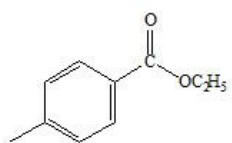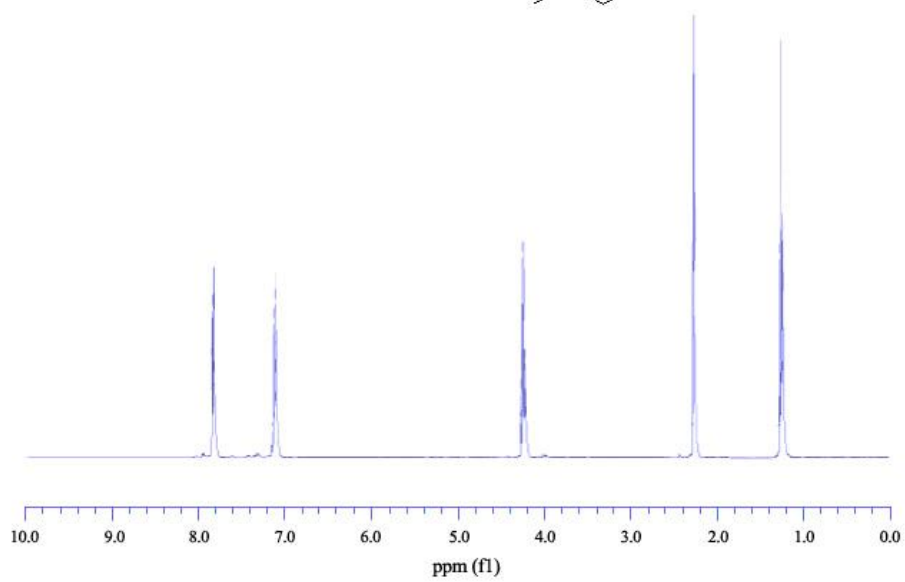

Table 4, entry 4

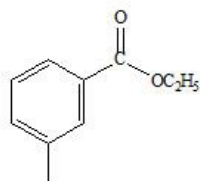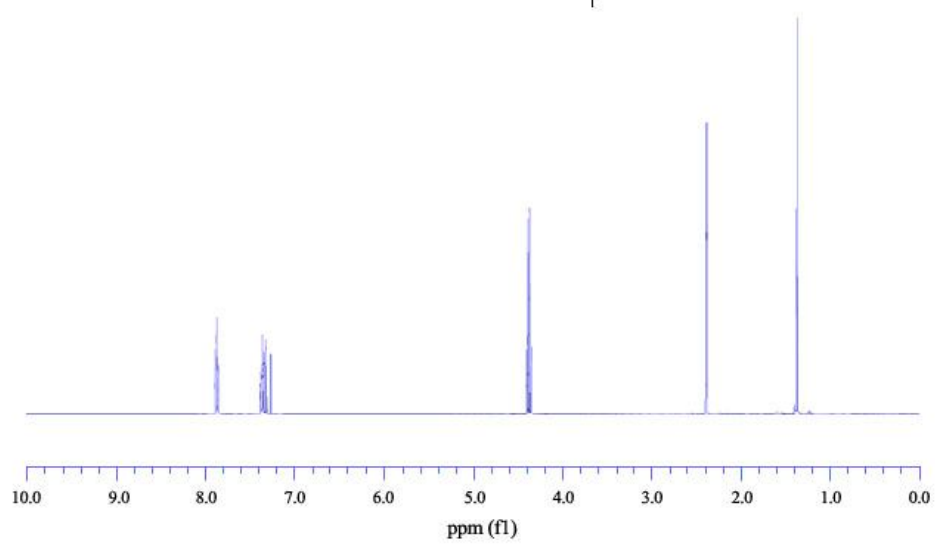

Table 4, entry 5

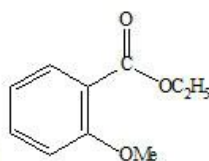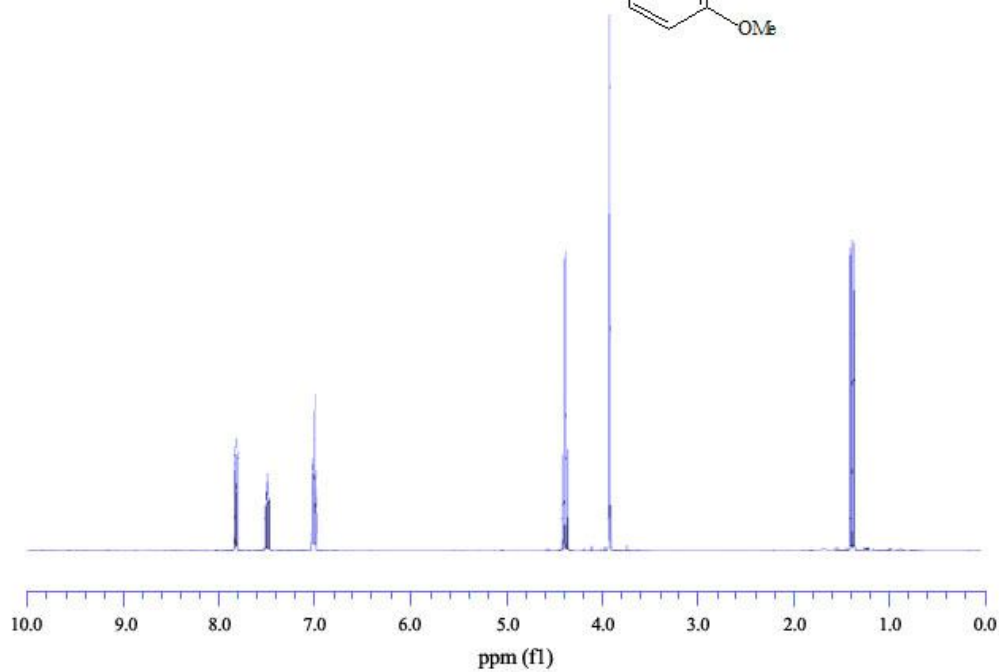

Table 4, entry 6

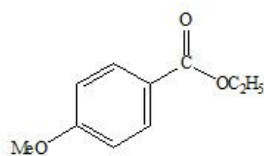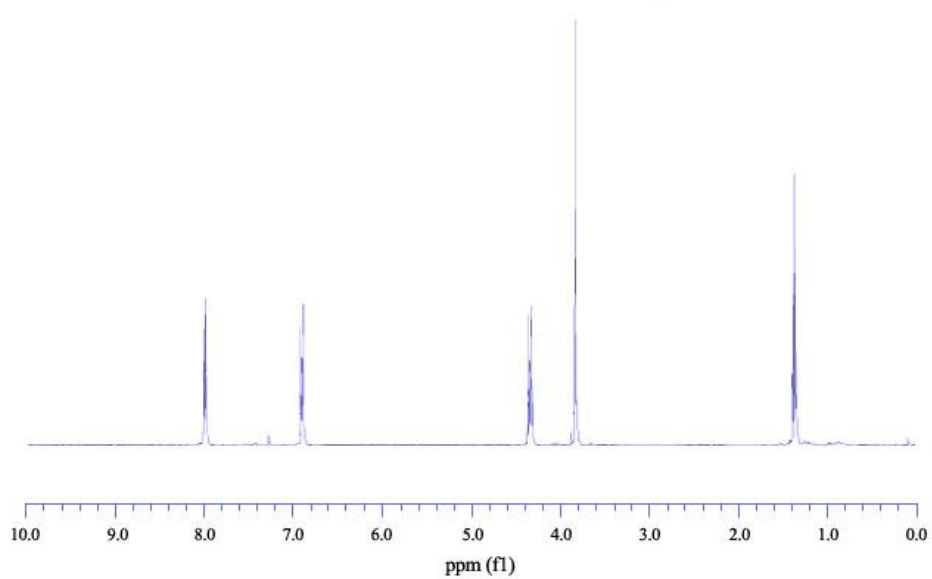

Table 4, entry 7

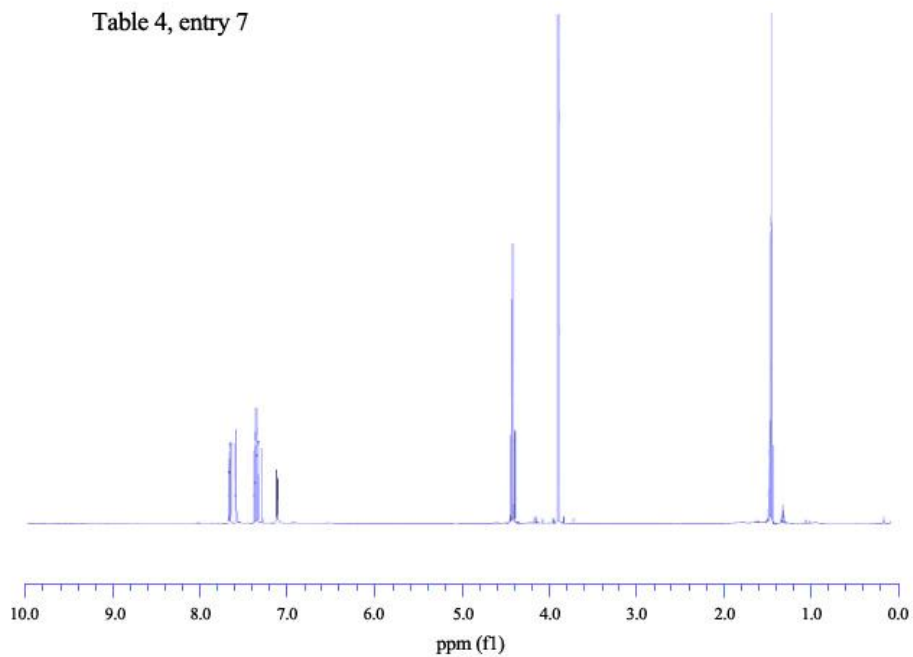

Table 4, entry 8

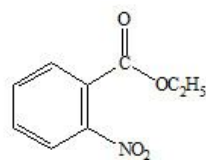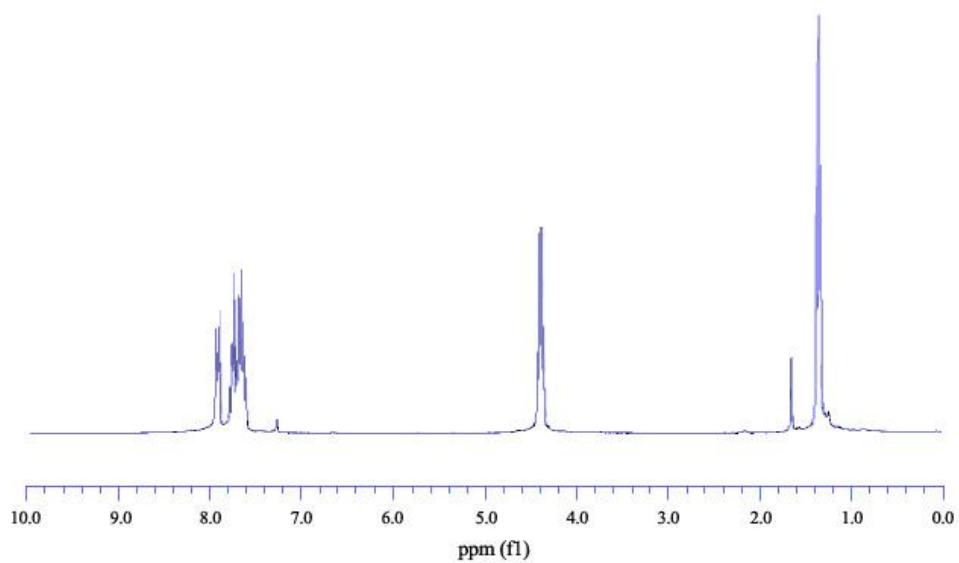



Table 4, entry 9

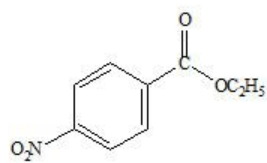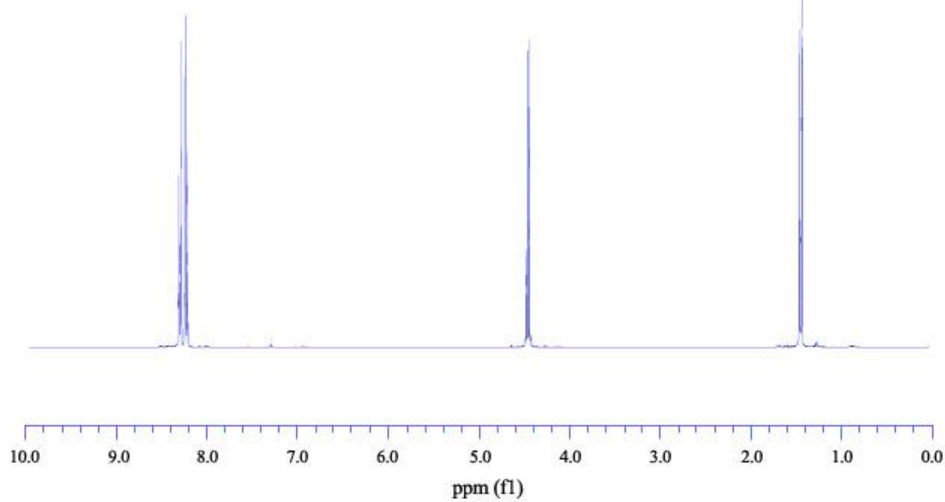

Table 4, entry 10

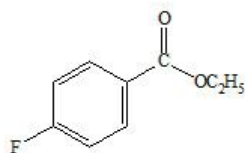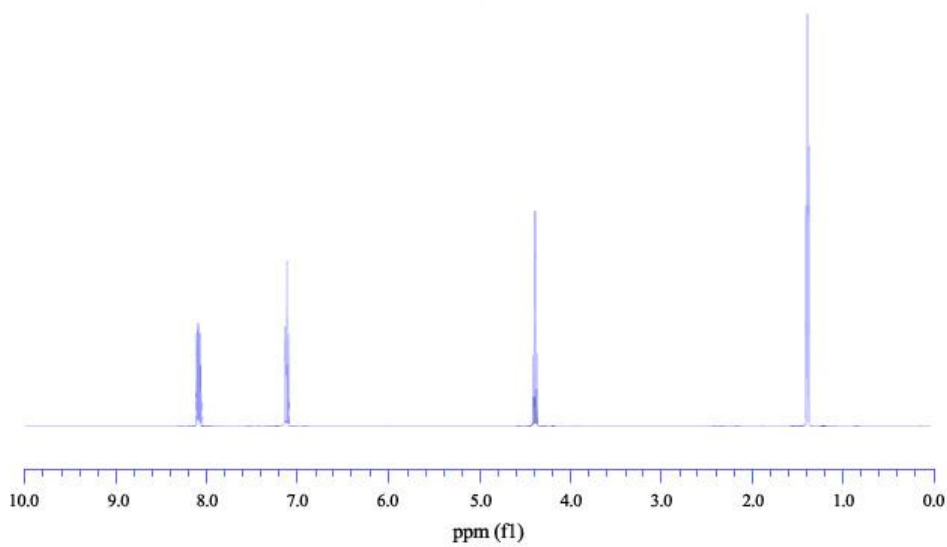

Table 4, entry 11

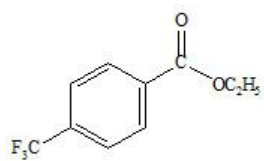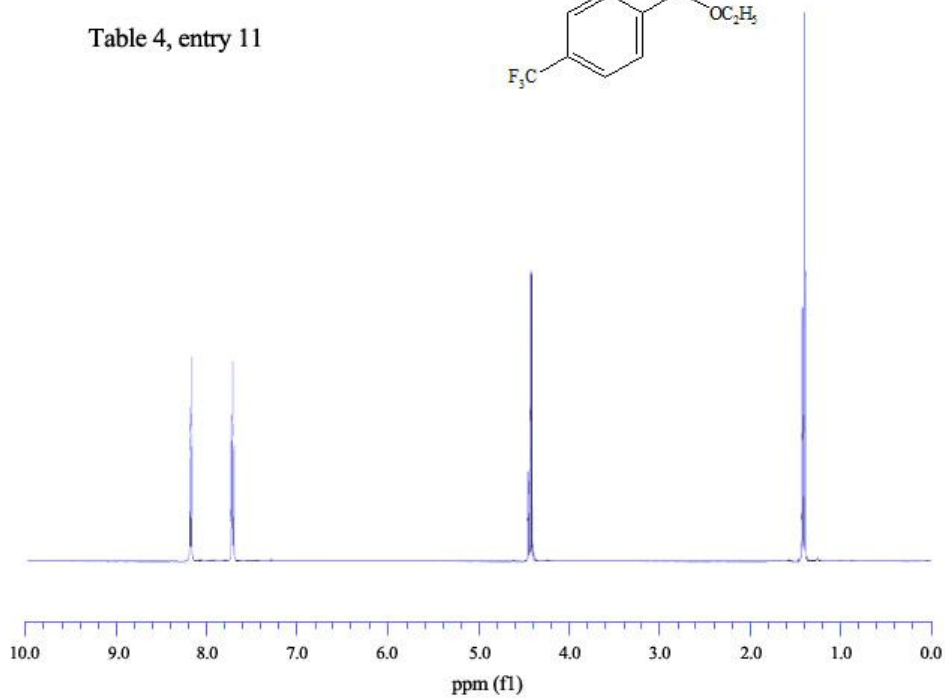

Table 4, entry 12

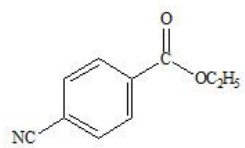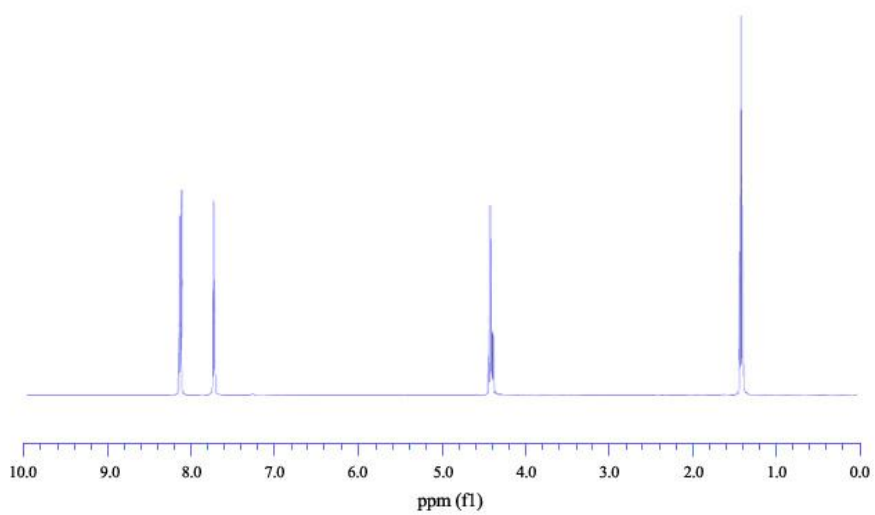

Table 4, entry 13

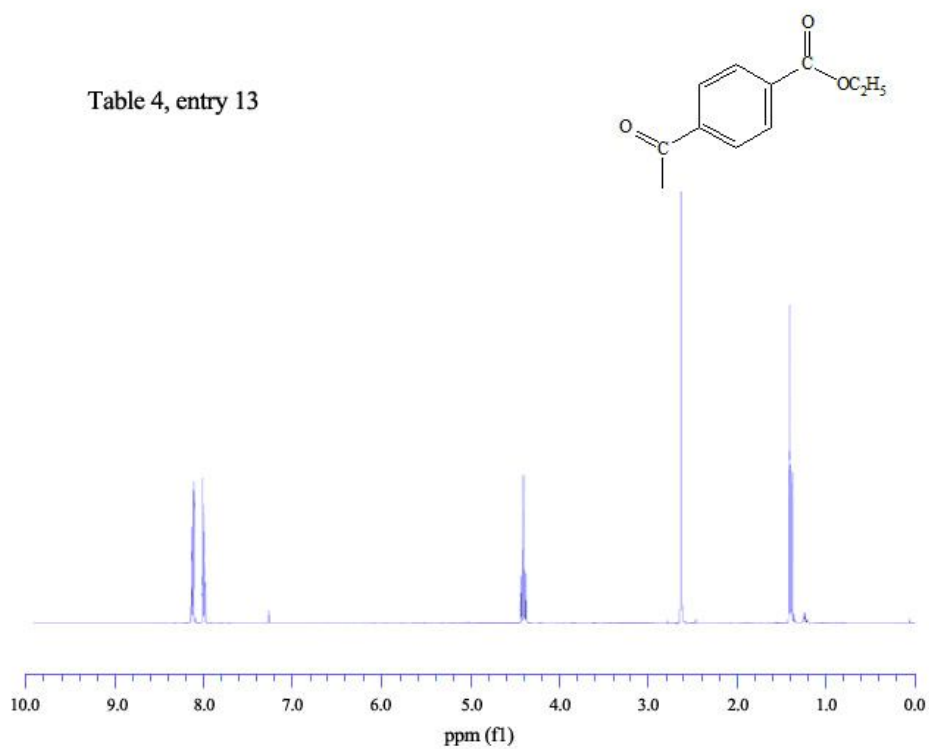

Table 4, entry 14

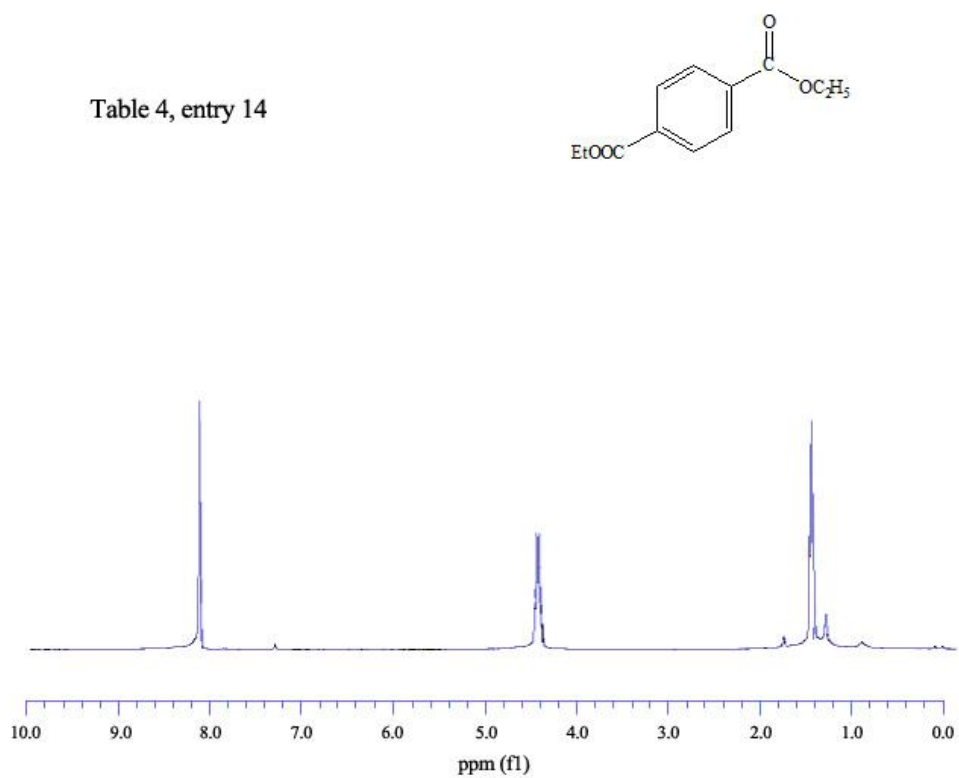

Table 4, entry 15

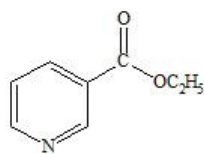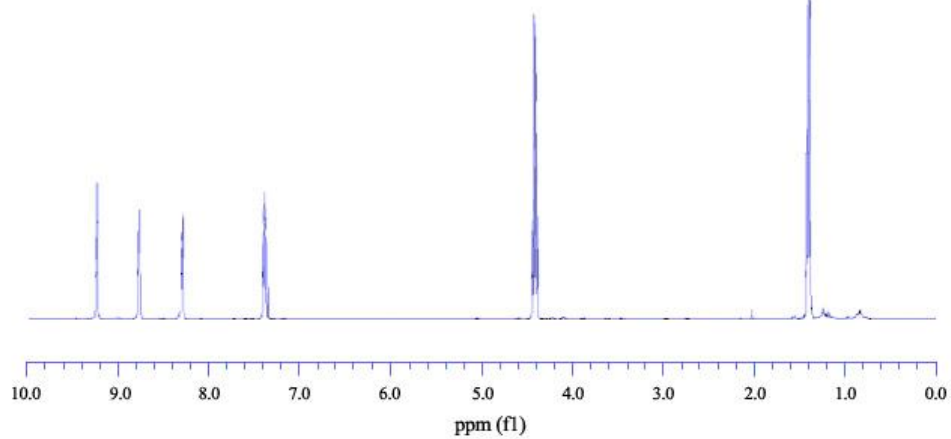

Table 4, entry 16

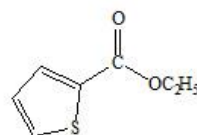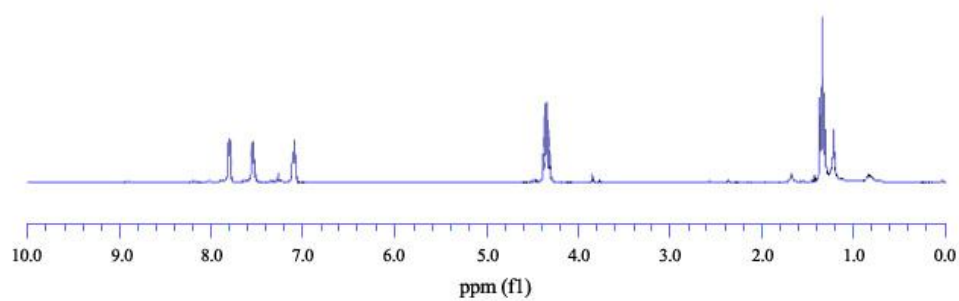

Table 4, entry 17

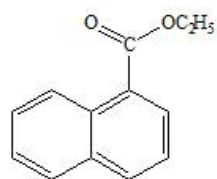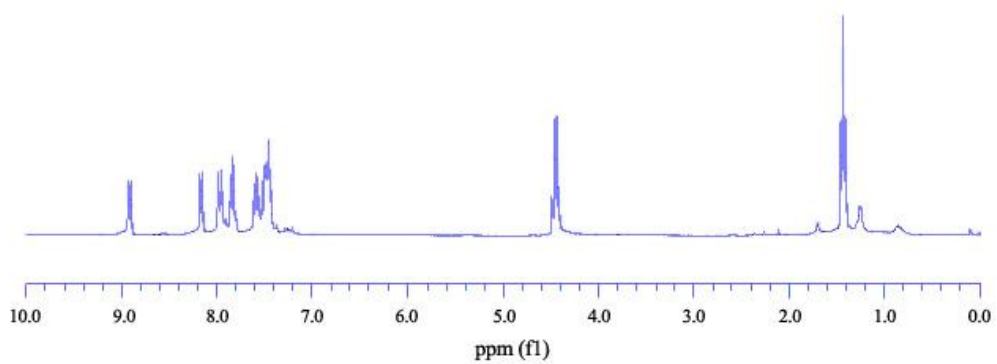

Table 4, entry 18

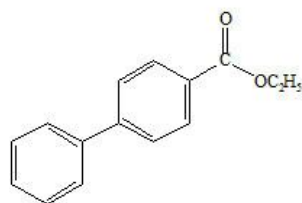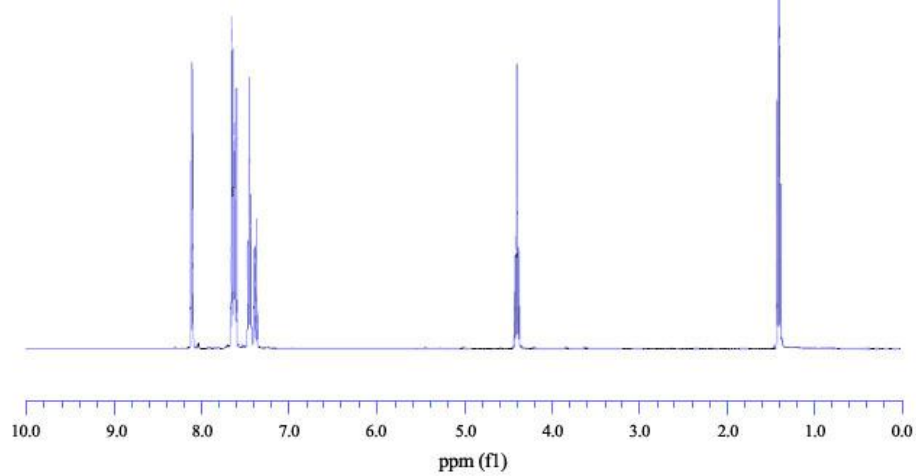

#### IV. $^1\text{H}$ NMR Spectra of amino carbonylation products

Table 7, entry 1

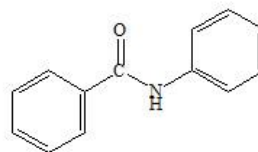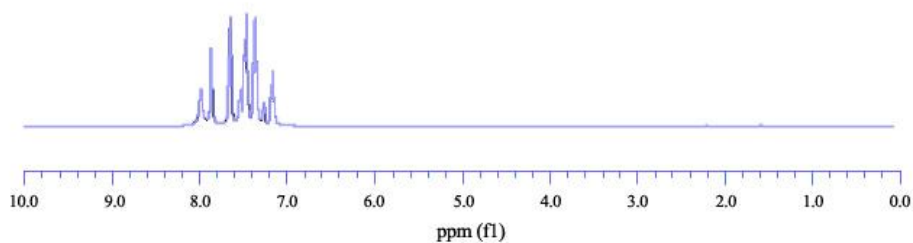

Table 7, entry 2

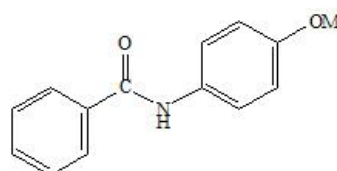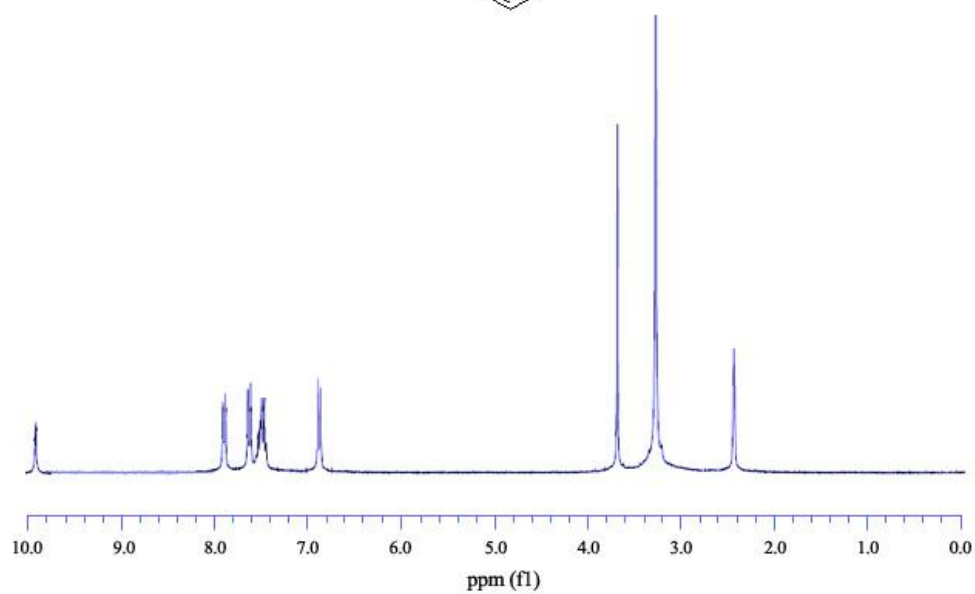

Table 7, entry 3

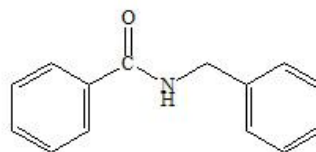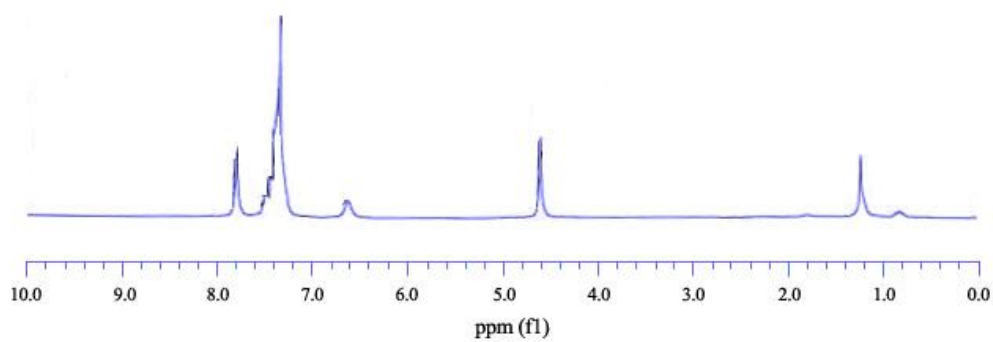

Table 7, entry 4

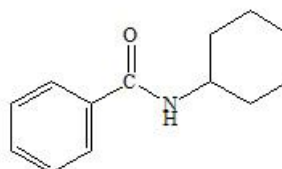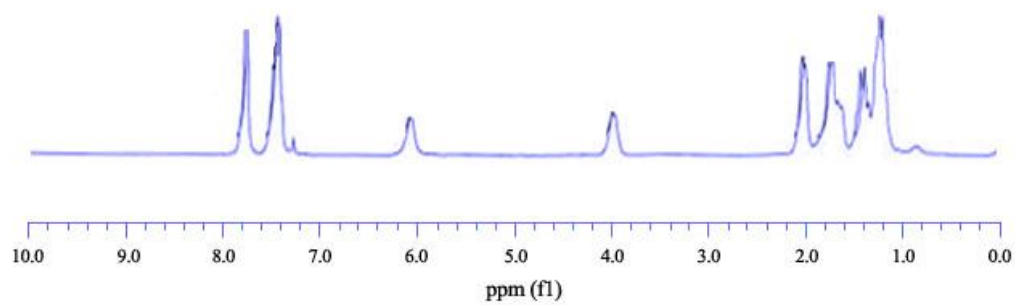

Table 7, entry 5

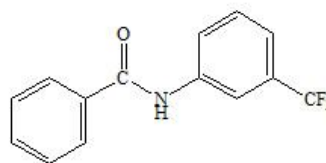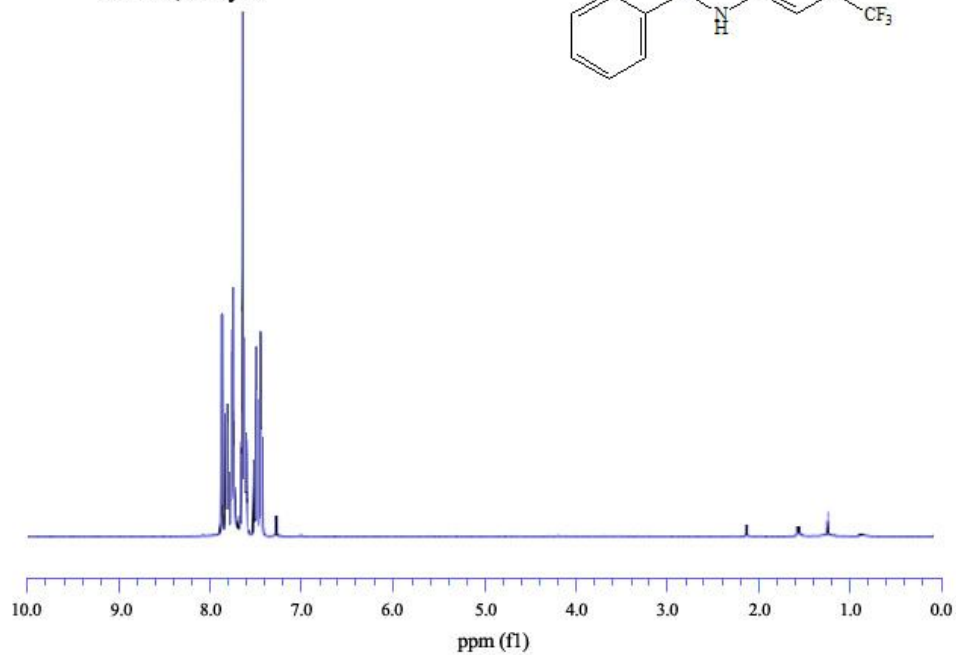

Table 7, entry 6

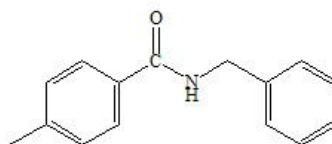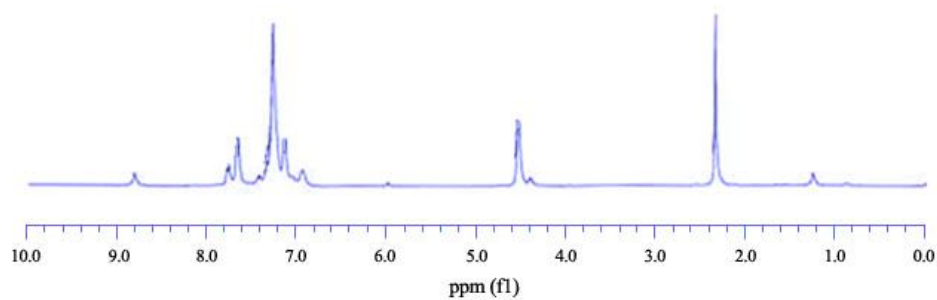



Table 7, entry 7

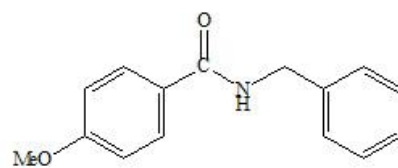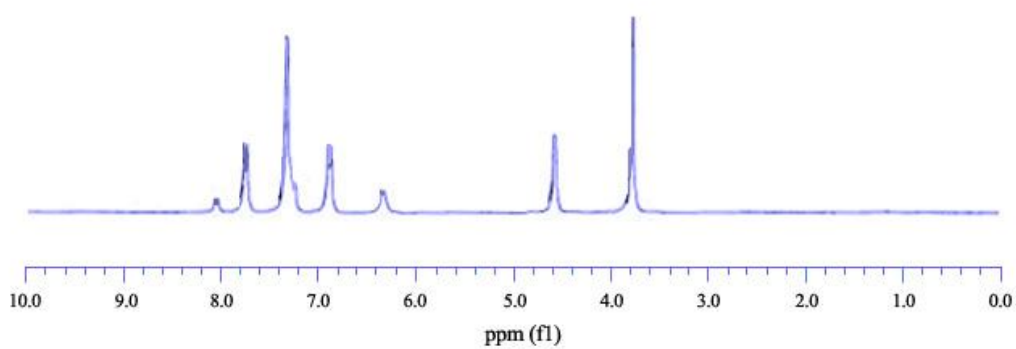

Table 7, entry 8

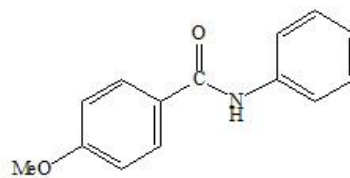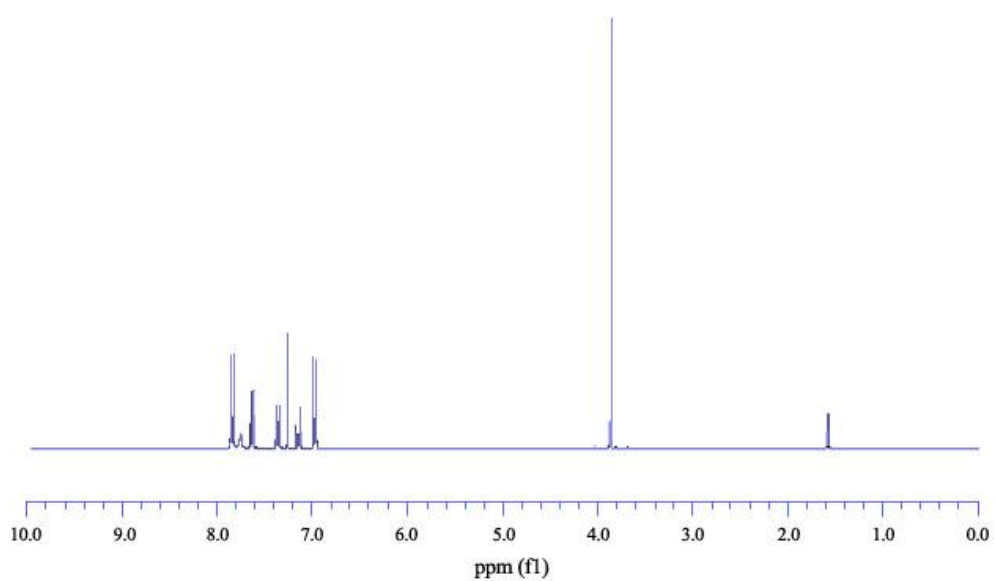

Table 7, entry 9

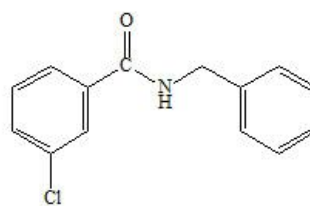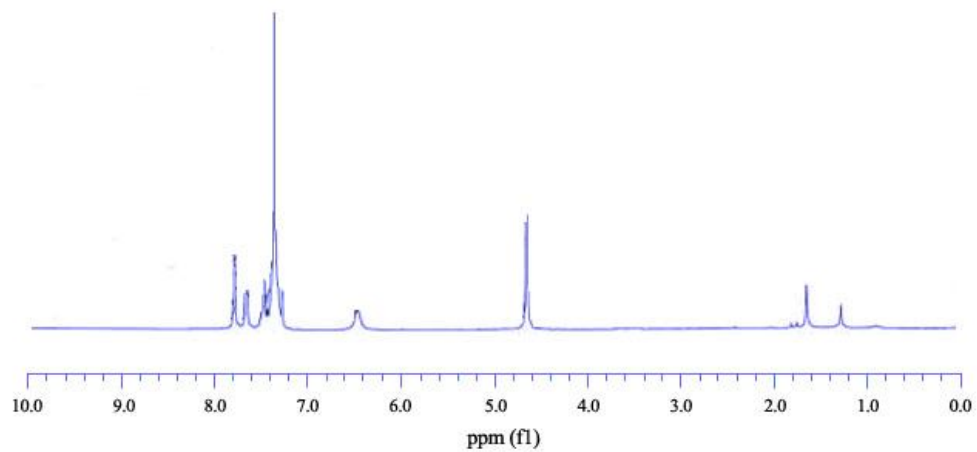

Table 7, entry 10

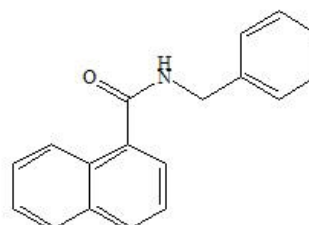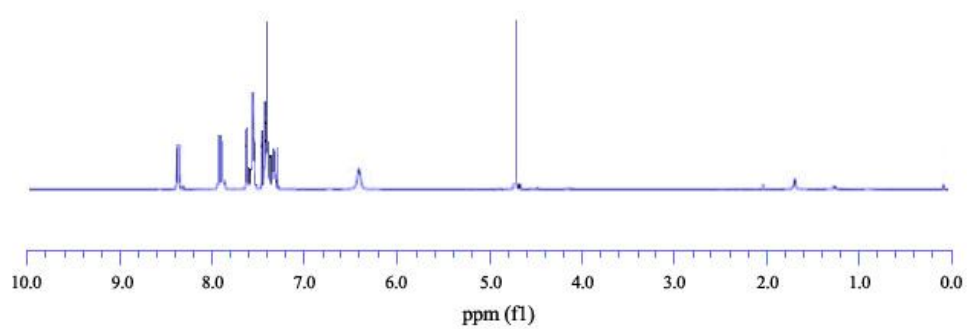

Table 7, entry 11

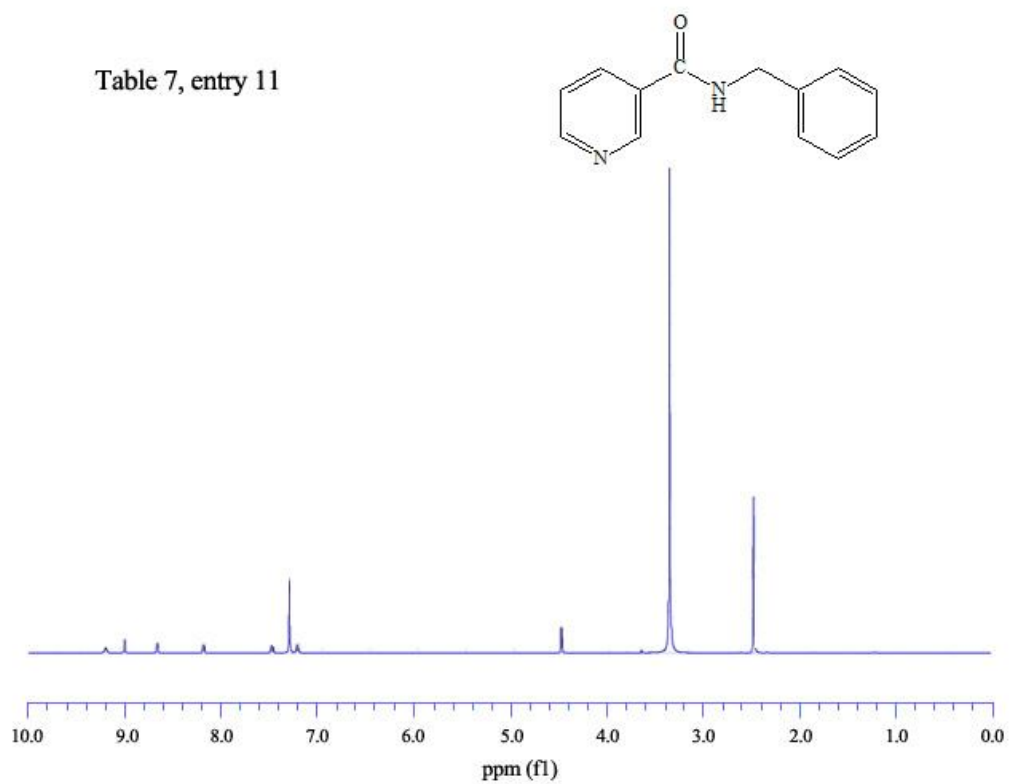

Table 7, entry 12

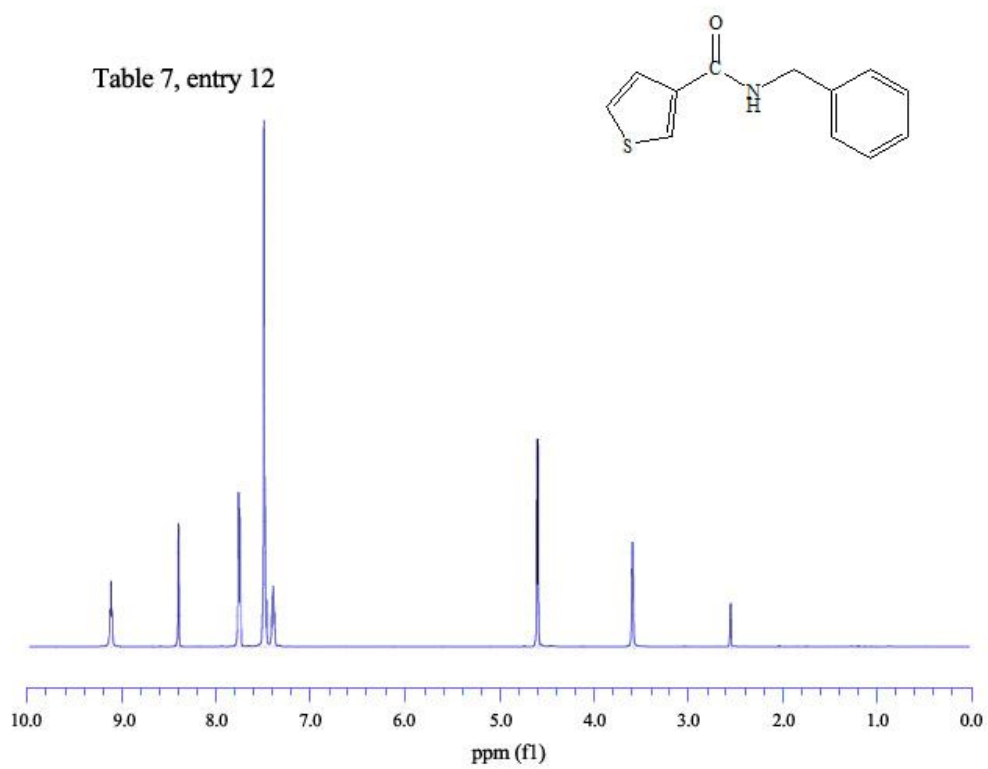

Table 7, entry 13

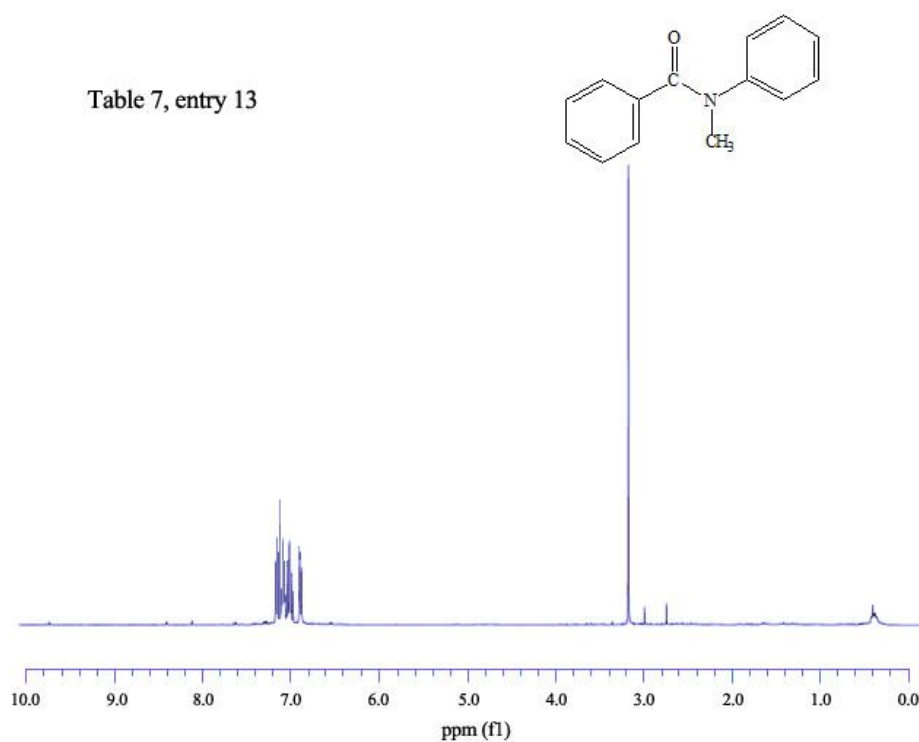

Table 7, entry 14

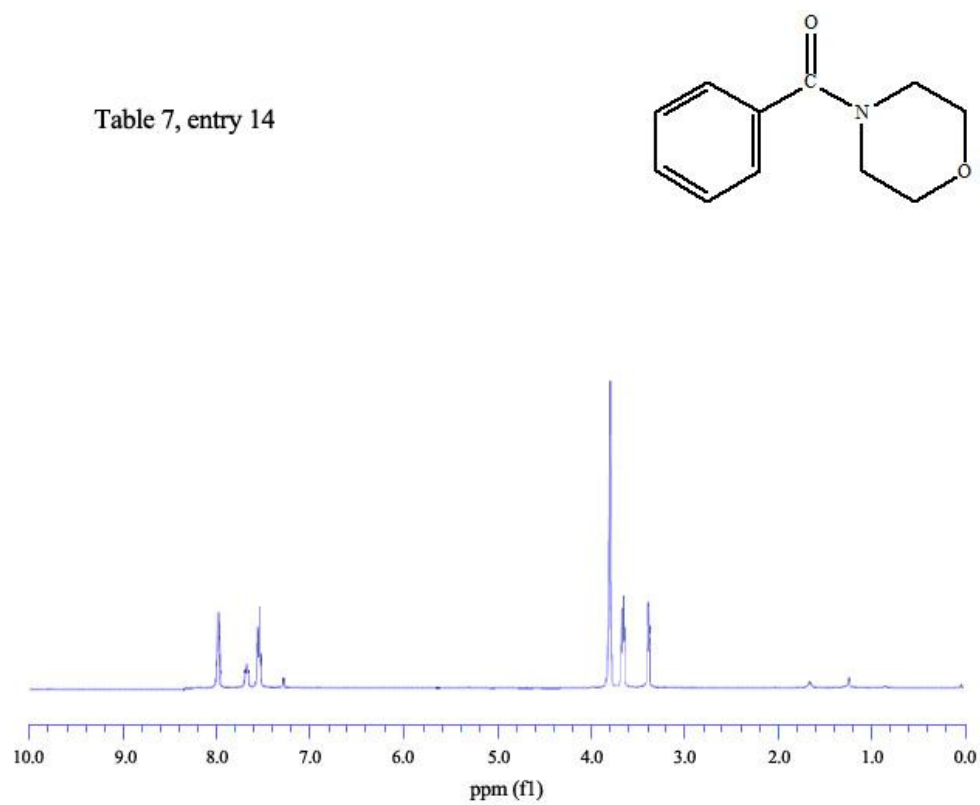

Table 7, entry 15

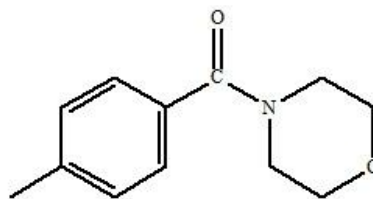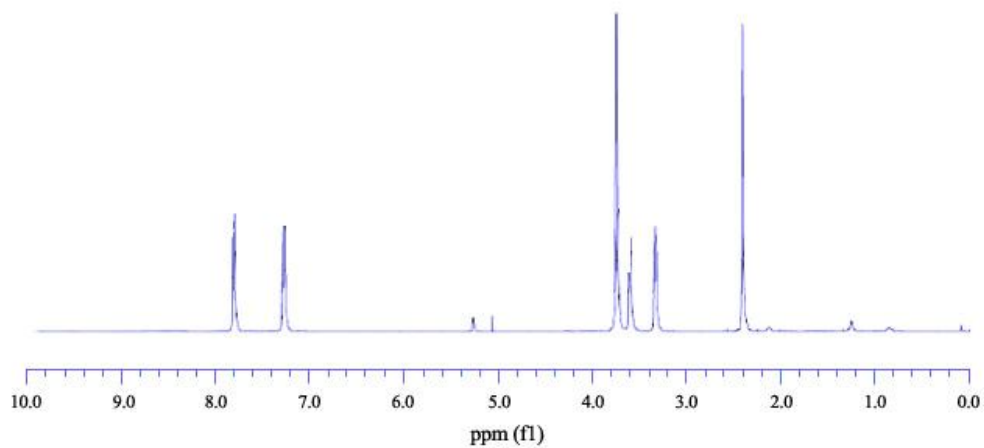

Table 7, entry 16

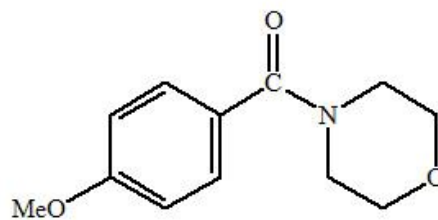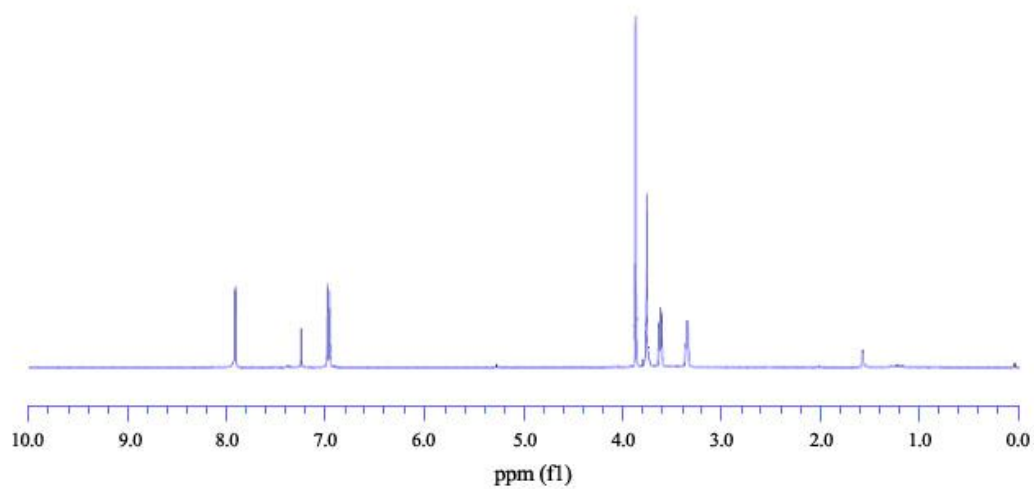

Table 7, entry 17

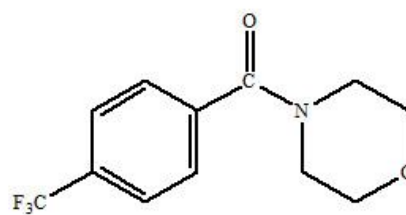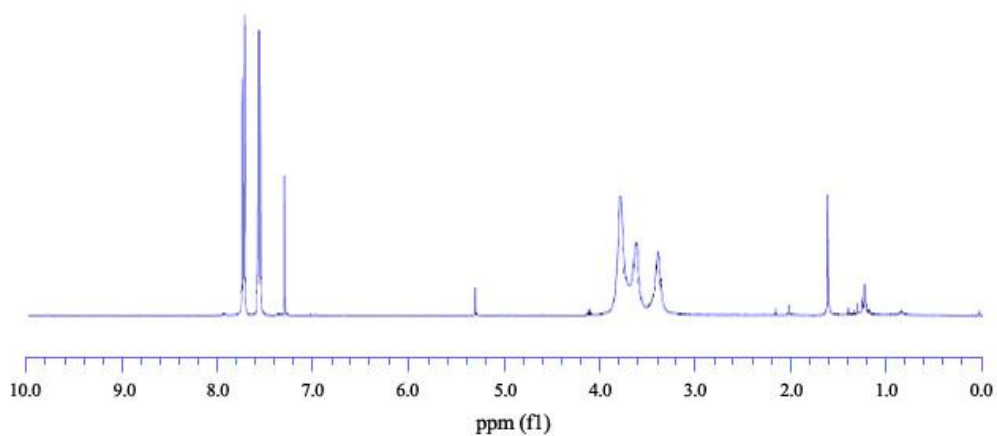

V.

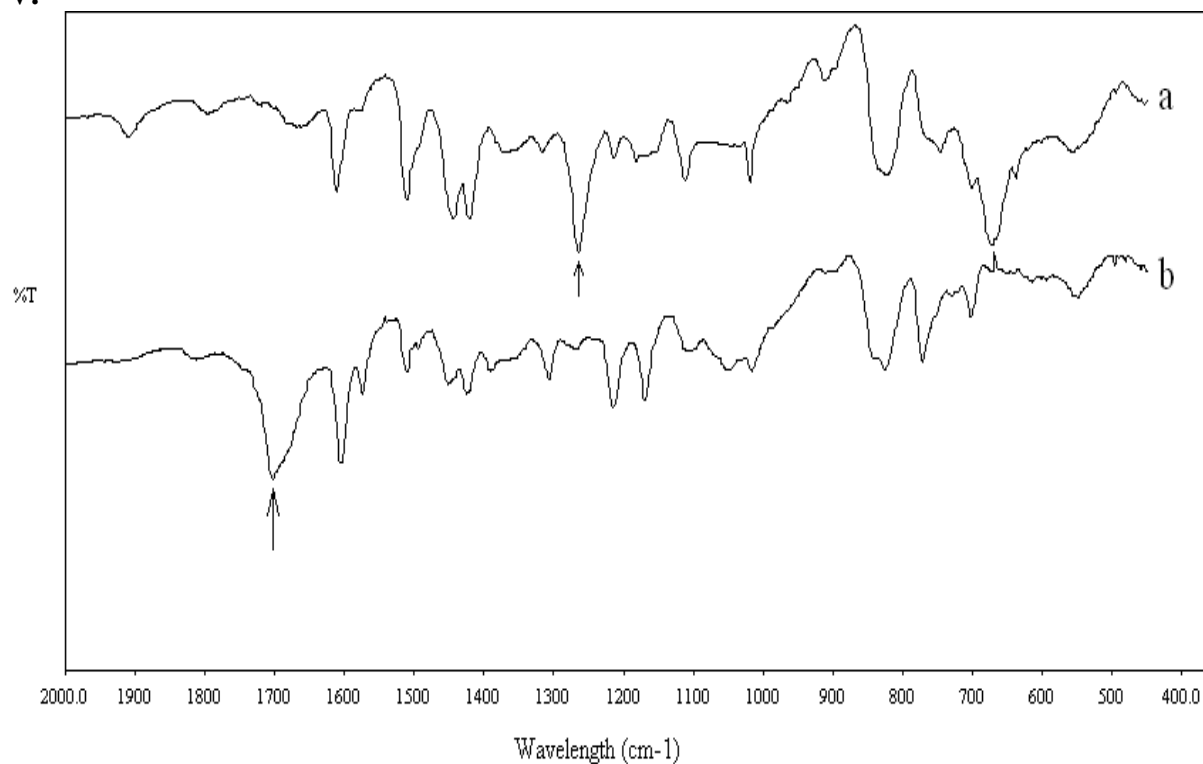

**Fig. S1.** FTIR spectra of chloromethylated polystyrene (a) and aldehyde functionalized polystyrene, PS-CHO (b)
